# Supplementary material for: The Comparative Efficacy of Multiple Acupuncture for Alzheimer's Disease: A Bayesian Network Meta-Analysis
Source: Evid Based Complement Alternat Med. 2022 May 17;2022:3288948. doi: 10.1155/2022/3288948 (PMC9129975; doi:10.1155/2022/3288948)
Supplement: Supplementary Materials — for this article are shown in Table S1–S8. Table S1. Search strategies of each database. Table S2. Full-text articles excluded with reasons. Table S3. (a) Node-splitting test result of improvement of MMSE and (b) node-splitting test result of improvement of ADL. Table S4. (a) The PSRF value of improvement of MMSE, (b) the PSRF value of reduction of ADAS-cog, (c) the PSRF value of response rate, and (d) the PSRF value of improvement of ADL. Table S5. Quality of evidence of improvement of MMSE in network meta-analysis. Table S6. Quality of evidence of reduction of ADAS-cog in network meta-analysis. Table S7. Quality of evidence of response rate in network meta-analysis. Table S8. Quality of evidence of improvement of ADL in network meta-analysis. Appendix 1. PRISMA-NMA checklist of items to include when reporting a systematic review involving a network meta-analysis. [file 3288948.f1.zip]

Archive with 2 entries (2 files):
- 3288948.f1/PRISMA-Network-Meta-analyses-of-Health-Care-Interventions-checklist.docx
- 3288948.f1/Supplemental material.doc
